# Supplementary material for: Five OsS40 Family Members Are Identified as Senescence-Related Genes in Rice by Reverse Genetics Approach
Source: Frontiers journal article supplement (doi:10.3389/fpls.2021.701529), 2021-09-03
Supplement: Data_Sheet_1.xls [file Data_Sheet_1.xls]

## Sheet: Sheet1
Gene ID	Gene Name	0W_RPKM	1W_RPKM	2W_RPKM	3W_RPKM	4W_RPKM	5W_RPKM
LOC_Os05g45450	OsS40-1	0.30364	0.48952	0.335545	0.29649	0.218056	0.722522
LOC_Os05g44260	OsS40-2	0.0821919	0.0883639	2.56324	0.220028	0	1.19765
LOC_Os10g27350	OsS40-3	1.20031	0.923261	1.18271	1.17549	1.31016	1.52498
LOC_Os03g02280	OsS40-4	0.295258	0.219042	0.0741416	1.13615	0.637231	1.9755
LOC_Os04g45834	OsS40-5	18.7246	21.7279	21.1717	16.6616	15.6721	13.9833
LOC_Os04g33760	OsS40-6	0.857823	0.824802	0.967199	1.23824	1.4884	1.43499
LOC_Os01g52730	OsS40-7	1.54337	0.562195	2.1678	2.36264	1.6624	16.4901
LOC_Os10g33990	OsS40-8	11.3066	7.0454	8.42635	5.15653	8.09896	12.4485
LOC_Os01g64300	OsS40-9	1.24072	0.808296	1.37292	2.73981	1.37629	6.26451
LOC_Os01g52740	OsS40-10	0.513829	1.3245	3.15755	5.4296	4.31059	19.4085
LOC_Os12g05980	OsS40-11	3.41069	2.38777	2.58307	2.63974	3.49162	3.32061
LOC_Os11g05600	OsS40-12	0.913465	0.543018	0.495745	0.857055	0.806463	0.98719
LOC_Os04g43990	OsS40-13	5.65761	8.9583	12.378	10.9695	23.0324	25.5508
LOC_Os05g45440	OsS40-14	21.782	21.3991	27.5282	13.64	15.2117	20.406
LOC_Os07g33270	OsS40-15	35.0963	31.2521	30.7845	36.899	48.9842	48.4633
LOC_Os07g32810	OsS40-16	0	0	0	0	0	0
