# Supplementary material for: Five OsS40 Family Members Are Identified as Senescence-Related Genes in Rice by Reverse Genetics Approach
Source: PubMed Central journal article supplement (PMC8446524; doi:10.3389/fpls.2021.701529), 2021-09-03
Supplement: Data_Sheet_3.pdf [file Data_Sheet_3.pdf]

Supplementary Table S1 The list of primer sequences used in this study

| Name and purpose                             | Forward primer          | Reverse Primer         |
|----------------------------------------------|-------------------------|------------------------|
| <b>Primers used for qRT-PCR</b>              |                         |                        |
| <i>OsS40-1</i>                               | ACGACGCTGTGAAGAAGAAGATG | AGCCTCCTCCGATCAACAATG  |
| <i>OsS40-2</i>                               | GAGGATCAGCCACGGGAGC     | TCCCCACGCACACCGAGAA    |
| <i>OsS40-3</i>                               | CCCAGGGTGAGGTTCCAC      | GTCGTCTGATCCGTCGCC     |
| <i>OsS40-4</i>                               | ACGAGGACGACGAGATGGTG    | CAGAGGTCGAGGAATCCGGT   |
| <i>OsS40-5</i>                               | AACCAATTCCTCGCCGTCC     | GTCGTCATCGTCCTCCTCGTC  |
| <i>OsS40-6</i>                               | TTGTCGCCAACCCAGTCC      | CGTCCCACCTTGAACATCTCCT |
| <i>OsS40-7</i>                               | GCTGTGGCCGGATCACC       | GATCTGCTGCTGGCCCG      |
| <i>OsS40-8</i>                               | GTCGAAGGGCGGGAAGGGGA    | CTCCAGATGGCGTTGCGG     |
| <i>OsS40-9</i>                               | TAGGCGGTTATCGGTGGAGG    | CGAGAAGGTGGTCATCGGTG   |
| <i>OsS40-10</i>                              | ATGGGCACTTGGGCATTACACC  | TCCAGGTCTTGTGCTGCATCTG |
| <i>OsS40-11</i>                              | CGACGACGAGGGGAGCAAGA    | TCCGAGGGTATCCTCACGGG   |
| <i>OsS40-12</i>                              | GACGTGCTCTGGCCTGCAT     | CGCCTCCGACGGTATCCTC    |
| <i>OsS40-13</i>                              | CGAGTTCGACGAGTCGGA      | CCTGTACTCGACCCCAAGAA   |
| <i>OsS40-14</i>                              | GTGGAGGAGCTCGACGAGTT    | GTGTCTCGTATGGCTGCACC   |
| <i>OsS40-15</i>                              | GTTCCAGTACCACCACCACC    | CGTACCAGACATCAGCCTCC   |
| <i>OsS40-16</i>                              | TCACGATCAGAGCAACGAAGCG  | TCCTCGTGCTGCCTGTTATTCC |
| <i>Actin</i>                                 | TCCATCTTGGCATCTCTCAG    | GTACCCTCATCAGGCATCTG   |
| <i>OSH36</i>                                 | GCACGGAGGCGAACGA        | TTGAGCGGTAGCACCCATT    |
| <i>OsNAP</i>                                 | CAAGAAGCCGAACGGTTC      | GTTAGAGTGGAGCAGCAT     |
| <i>SGR</i>                                   | AGGGGTGGTACAACAAGCTG    | GCTCCTTGCGGAAGATGTAG   |
| <i>NYC1</i>                                  | CATGCAACACCAACAAAAGG    | GACCATTCCAGGAGAAGCAG   |
| <i>OsI85</i>                                 | GAGCAACGGCGTGGAGA       | GCGGCGGTAGAGGAGATG     |
| <i>OsEIN3</i>                                | ATCTTCCCGCAACCTACAA     | CATGATCGTGGCATTGTCGT   |
| <i>OsS3H</i>                                 | GCAACGACCGGTATAAGAGC    | ATTCGTCGTAGTAGGCCTGG   |
|                                              |                         |                        |
| <b>Target site Sequences for CRISPR/Cas9</b> |                         |                        |
|                                              |                         |                        |

|                                               |                                         |                                          |
|-----------------------------------------------|-----------------------------------------|------------------------------------------|
| <i>OsS40-1</i>                                | TGGCAGCCGACGATAAGG                      | GAAGCCCACGACCGAGAC                       |
| <i>OsS40-2</i>                                | TCCTCGTCTCTTCTCCTCCTC                   | GATCAGGTCTCGAGGAAGCC                     |
| <i>OsS40-4</i>                                | GGGGAGATCAGAGCCAAAGG                    | CTCGTCGTCCTCGTTGTCTG                     |
| <i>OsS40-5</i>                                | CTGGTCAGTAGCCACCACAC                    | CGACTGGTGGTACGGCTG                       |
| <i>OsS40-6</i>                                | CCATAAAAGCCAAACCCCC                     | CTCTTGTCCCCCTCGTGCAA                     |
| <i>OsS40-7</i>                                | GTGCCGGGTCATCCTTCAAT                    | CAAGGCCCAAACGTCCAAAC                     |
| <i>OsS40-8</i>                                | TCCCCCTGCCGCCGTACTION                   | CCGTTGCTTTGCTTCTCCC                      |
| <i>OsS40-10</i>                               | CTCGATGAAGCCGGTCATGC                    | ATCTGTTCCGCTCCTGCTC                      |
| <i>OsS40-11</i>                               | GACCGCCTCCTGCTCTTTC                     | TCTCAGTCGAGGAATCCGGT                     |
| <i>OsS40-12</i>                               | CGTCCACCCCAACCTCCCCT                    | CCGCCCACATCACCCCCCTA                     |
| <i>OsS40-13</i>                               | TGCCAGTCCGGTATGTTTAC                    | GACAACCAAACGTCCAAGGC                     |
| <i>OsS40-14</i>                               | ATGGCGATGGTGGTGG                        | TCCTTCGATGAACCCG                         |
| <i>OsS40-15</i>                               | CGGCGCTTCTCCTCCTCC                      | CCGGCTTTCCTCTCCGAC                       |
| <i>OsS40-16</i>                               | CCTCCCCTTGCTCCTCCT                      | TGTGAGTCTGTTGGTCGGTG                     |
|                                               |                                         |                                          |
| <b>Primer used for Transcription Activity</b> |                                         |                                          |
| <i>OsS40-1</i>                                | CTCGAGGGGGGGCCCATGGAGGAA<br>TTCCAAGAGGC | AGTACCCGGGTACCCATTTCTCGATGA<br>ATCCGGTCA |
| <i>OsS40-7</i>                                | CTCGAGGGGGGGGCC<br>ATGGCGACGATGGGAGAG   | AGTACCCGGGTACCCA<br>TCCTTCAATGAACCCGGTCA |
| <i>OsS40-12</i>                               | CTCGAGGGGGGGGCC<br>ATGGAGCGCCTCCTGCA    | AGTACCCGGGTACCCA<br>GTCGAGGAAGCCGGTGC    |
| <i>OsS40-13</i>                               | CTCGAGGGGGGGGCC<br>ATGGCTGGGAGCGCGA     | AGTACCCGGGTACCCA<br>GTCCTCGAAGCCGGTCTTC  |
| <i>OsS40-14</i>                               | CTCGAGGGGGGGGCC<br>ATGGCGATGGTGGTGG     | AGTACCCGGGTACCCA<br>TCCTTCGATGAACCCG     |
| <i>OsS40-15</i>                               | CTCGAGGGGGGGGCC<br>ATGGCGAAGGCGCGGAA    | AGTACCCGGGTACCCA<br>GCCGTCGAAGCCGGTTCG   |

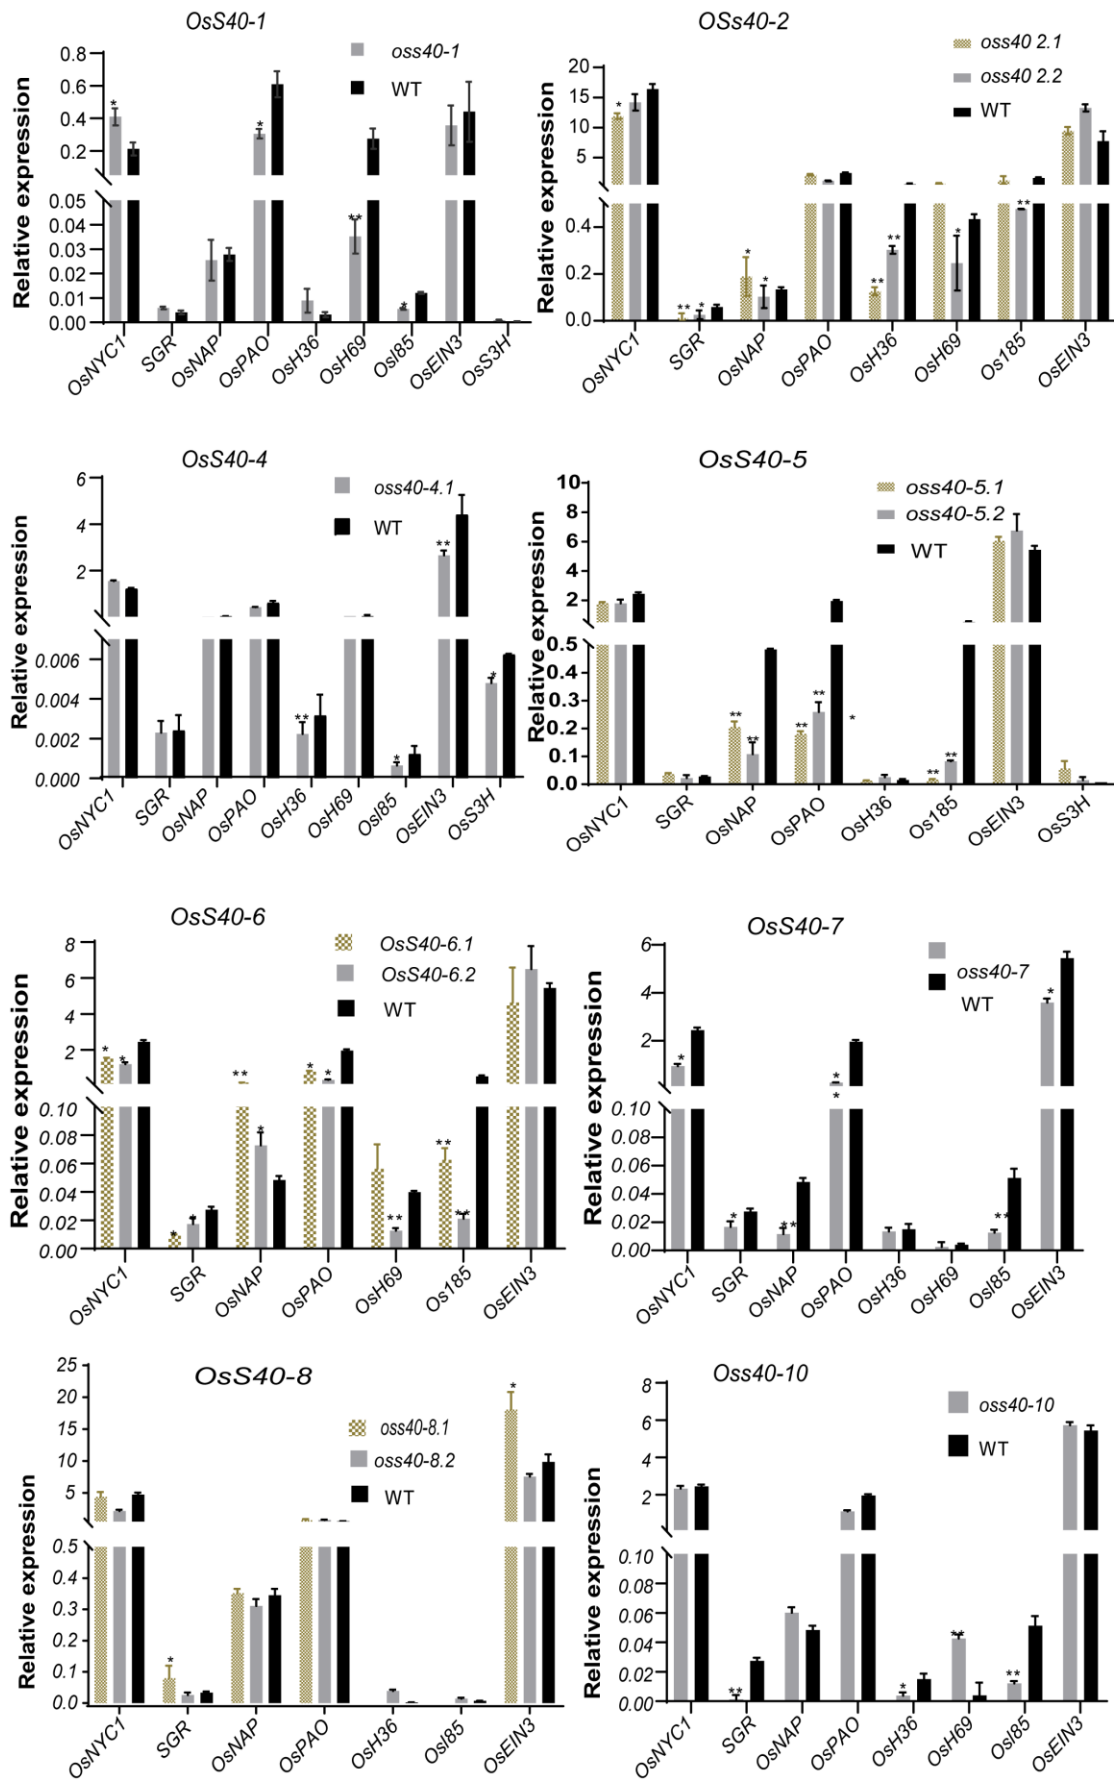

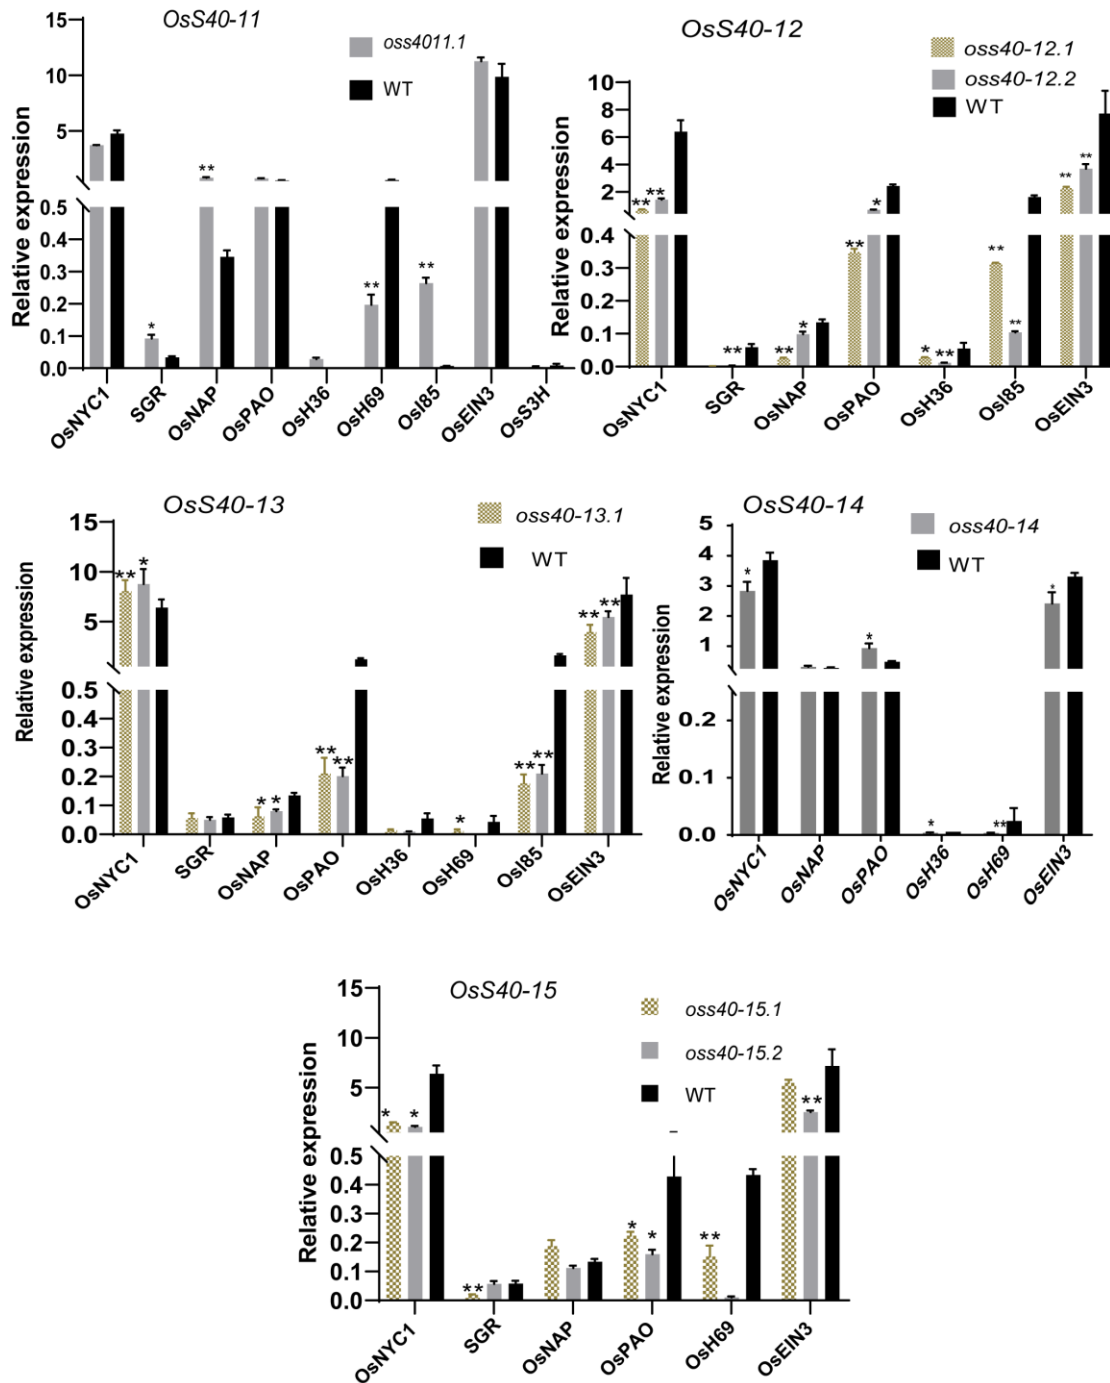

Supplementary Figure S1 Expression profiles of senescence related genes are detected in various oss40s mutants by RT-qPCR. The values are mean  $\pm$  S.D. Mean and SD values were obtained from three biological replicates and three technical replicates. Significant differences of the expression levels normalized to WT were evaluated using Student's t-test (\*,  $P < 0.05$ ; \*\*,  $P < 0.01$ ).

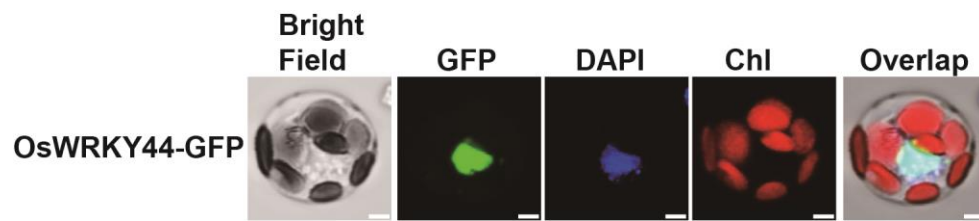

Supplementary Figure S2 Subcellular localization of OsWRKY44 in rice protoplast. Chl, Chlorophyll fluorescence.

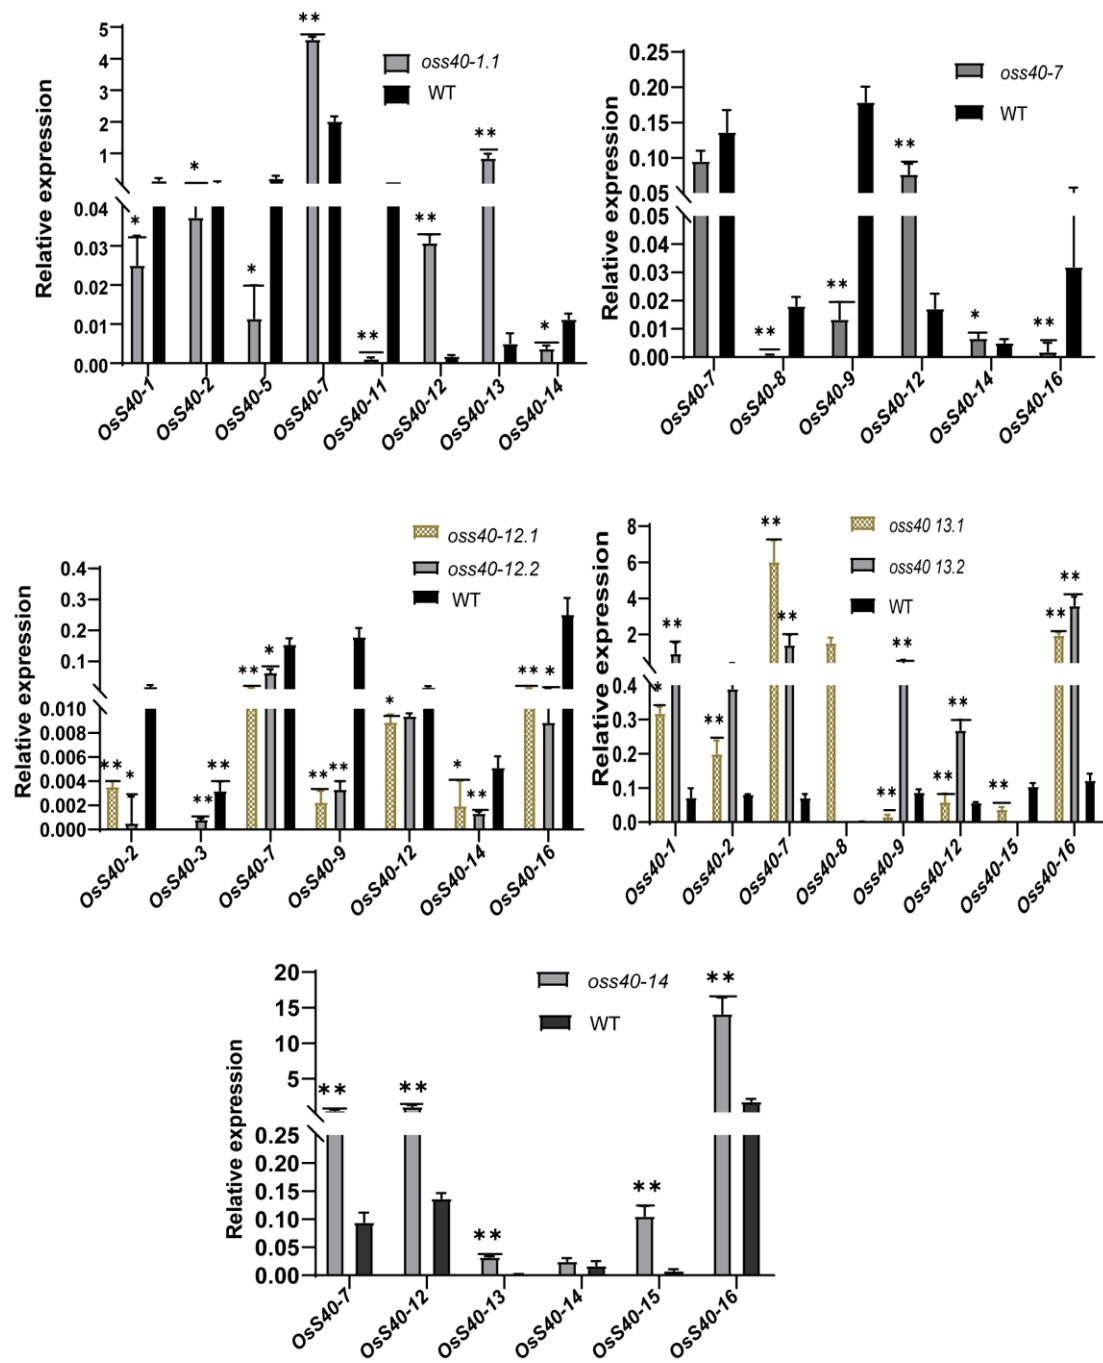

Supplementary Figure S3 Expression profiles of OsS40 genes are detected in various *oss40*s mutants by RT-qPCR. The values are mean  $\pm$  S.D. Mean and SD values were obtained from three biological replicates and three technical replicates. Significant differences of the expression levels normalized to WT were evaluated using Student's t-test (\*,  $P < 0.05$ ; \*\*,  $P < 0.01$ ).
