# Supplementary material for: Five OsS40 Family Members Are Identified as Senescence-Related Genes in Rice by Reverse Genetics Approach
Source: Front Plant Sci. 2021 Sep 3;12:701529. doi: 10.3389/fpls.2021.701529 (PMC8446524; doi:10.3389/fpls.2021.701529)
Supplement: Supplementary Dataset 2 — Expression profiles of the WRKY family in oss40-14 relative to WT. [file Data_Sheet_2.xlsx]

## Sheet: Sheet2
gene_id	s14_L_count	WT_L_count	s14_L_fpkm	WT_L_fpkm	WT_Lvss14_L_WT_L	WT_Lvss14_L_s14_L	WT_Lvss14_L_log2FoldChange	WT_Lvss14_L_pvalue	WT_Lvss14_L_padj	gene_name	gene_chr	gene_start	gene_end	gene_strand	gene_length	gene_biotype	gene_description
Os01g0182700	18	21	0.817805	1.00799	21.5528	17.5379	0.295173	0.725128	0.966842	WRKY GENE 102	1	4347188	4356468	-	1204	protein_coding	-	WRKY transcription factor 13
Os01g0182700	18	21	0.817805	1.00799	21.5528	17.5379	0.295173	0.725128	0.966842	WRKY GENE 102	1	4347188	4356468	-	1204	protein_coding	-	WRKY transcription factor 13
Os01g0185900	8	27	0.236039	0.84162	27.7101	7.79343	1.81312	0.0124954	0.112223	WRKY GENE 107	1	4566304	4568589	+	1854	protein_coding	-	WRKY transcription factor 9
Os01g0186000	24	51	1.85693	4.16881	52.3394	23.3846	1.1579	0.0372812	0.230646	WRKY GENE 10	1	4572565	4573271	-	707	protein_coding	-	WRKY transcription factor 10
Os01g0584900	31	17	1.55432	0.900505	17.4479	30.2058	-0.787712	0.207264	0.611841	WRKY GENE 77	1	22731943	22733237	+	1091	protein_coding	-	WRKY transcription factor 77
Os01g0624700	76	98	2.99737	4.0833	100.572	74.056	0.440822	0.354516	0.773222	WRKY GENE 12	1	24945282	24947217	-	1387	protein_coding	-	WRKY transcription factor 12,03
Os01g0626400	67	75	2.45646	2.90505	76.9687	65.286	0.236992	0.638942	0.927999	WRKY GENE11	1	25009514	25012233	+	1492	protein_coding	-	WRKY transcription factor 11
Os01g0665500	134	185	21.2466	30.9895	189.853	130.574	0.539542	0.233648	0.653149	WRKY GENE16	1	27196814	27197158	-	345	protein_coding	-	WRKY transcription factor 16
Os01g0730700	51	85	1.74036	3.06441	87.2309	49.6948	0.810088	0.108823	0.43352	WRKY GENE 14	1	30480114	30481849	-	1603	protein_coding	-	WRKY transcription factor 14
Os01g0750100	5086	5792	204.419	245.942	5943.87	4956.05	0.262205	0.524238	0.872379	WRKY GENE 13	1	31409132	31410736	-	1361	protein_coding	-	WRKY transcription factor 13
Os01g0821300	48	264	3.28212	19.0711	270.924	46.7714	2.53093	1.57386e-07	1.13501e-05	WRKY GENE 108	1	35032858	35033657	-	800	protein_coding	-	WRKY transcription factor 86
Os01g0826400	1213	1252	32.2418	35.1577	1284.83	1182.01	0.120323	0.773641	0.983396	WRKY GENE 24	1	35347982	35350546	+	2058	protein_coding	-	WRKY transcription factor 24
Os02g0181300	10367	11935	356.44	433.525	12247.9	10102.1	0.277878	0.499045	0.863276	WRKY GENE 71	2	4542938	4544874	+	1591	protein_coding	-	WRKY transcription factor 71
Os03g0758000	79	106	6.209	8.80154	108.782	76.9794	0.498137	0.295188	0.706159	WRKY GENE3	3	31323426	31325253	-	696	protein_coding	-	WRKY transcription factor 3
Os04g0287400	3425	4036	150.244	187.045	4141.83	3337.49	0.311492	0.450034	0.852497	WRKY GENE 51	4	12425564	12426962	+	1247	protein_coding	-	WRKY transcription factor 51
Os05g0183100	843	759	58.2981	55.4533	778.903	821.459	-0.0767402	0.859062	1	WRKY GENE 67	5	4998309	4999626	-	791	protein_coding	-	WRKY transcription factor 67
Os05g0322900	5067	7062	162.281	238.947	7247.17	4937.53	0.553614	0.179425	0.565042	WRKY GENE 45	5	14991579	14993673	+	1708	protein_coding	-	WRKY transcription factor 45
Os05g0343400	21208	18335	591.597	540.338	18815.7	20666.1	-0.135327	0.741751	0.973617	WRKY GENE 53	5	16150266	16152633	+	1961	protein_coding	-	WRKY transcription factor 53
Os05g0474800	345	279	8.42885	7.20132	286.318	336.183	-0.231557	0.593332	0.912552	WRKY GENE 70	5	23310508	23313449	-	2239	protein_coding	-	WRKY transcription factor 70
Os05g0537100	470	700	22.3371	35.1467	718.356	457.989	0.649232	0.124594	0.471699	WRKY GENE 7	5	26682661	26684165	+	1151	protein_coding	-	WRKY transcription factor 7
Os05g0565900	33	42	1.21315	1.6312	43.1034	32.1547	0.421185	0.466352	0.863276	WRKY GENE 49	5	28154693	28157931	+	1488	protein_coding	-	WRKY transcription factor 49
Os06g0146250	140	126	4.01799	3.82041	129.306	136.421	-0.0772498	0.883826	1	WRKY GENE 73	6	2428013	2433345	+	1906	protein_coding	-	WRKY transcription factor 73
Os12g0116700	300	458	13.7558	22.1864	470.011	292.333	0.684833	0.108748	0.433351	WRKY GENE 64	12	824221	825793	-	1193	protein_coding	-	WRKY transcription factor 64
Os06g0158100	35	88	1.62804	4.32451	90.3096	34.1036	1.40155	0.00616685	0.0676466	WRKY GENE 113	6	2959754	2963006	+	1176	protein_coding	-	WRKY transcription factor 93
Os07g0583700	843	810	19.8169	20.1164	831.241	821.459	0.0170673	0.969876	1	WRKY GENE 87	7	23654137	23659609	-	2327	protein_coding	-	WRKY76
Os08g0386200	4476	1898	177.941	79.7149	1947.77	4361.63	-1.163	0.00532562	0.060702	WRKY GENE 69	8	18220044	18221513	+	1376	protein_coding	-	WRKY transcription factor 69
Os08g0499300	408	223	9.48913	5.47935	228.849	397.573	-0.796511	0.0649452	0.32133	WRKY GENE 30	8	24645932	24649832	-	2352	protein_coding	-	WRKY transcription factor 30
Os09g0334500	3768	3155	120.396	106.502	3237.73	3671.72	-0.181472	0.660123	0.938565	WRKY GENE 74	9	10128837	10131086	+	1712	protein_coding	-	WRKY transcription factor 74
Os09g0417800	404	1440	16.3944	61.7354	1477.76	393.676	1.90799	9.86882e-06	0.00042268	WRKY GENE 62	9	14992918	14994888	-	1348	protein_coding	-	WRKY transcription factor 62
Os11g0116900	7	103	0.360899	5.61027	105.703	6.81897	3.92934	8.40231e-10	1.14974e-07	WRKY GENE 46	11	759592	763326	-	1061	protein_coding	-	WRKY transcription factor 46a
Os11g0117500	67	528	3.03397	25.2597	541.846	65.286	3.05056	1.07314e-10	1.91101e-08	WRKY GENE 40	11	787544	789030	-	1208	protein_coding	-	WRKY transcription factor 40
Os11g0117600	591	1654	69.5245	205.563	1697.37	575.898	1.5592	0.000247559	0.00587687	WRKY GENE 50	11	794803	795540	-	465	protein_coding	-	WRKY transcription factor 50
Os11g0490900	289	404	13.4658	19.8873	414.595	281.614	0.557761	0.194257	0.589888	WRKY GENE 72	11	17352249	17355819	+	1174	protein_coding	-	WRKY transcription factor 72
Os12g0116600	2685	4500	45.7554	81.0157	4617.99	2616.4	0.819654	0.0479604	0.266944	WRKY GENE 95	12	817004	820412	-	3210	protein_coding	-	WRKY transcription factor 56

## Sheet: Sheet1
gene_id	s14_L_count	s14_D_count	WT_L_count	WT_D_count	14_L_WT_Lvsslog2FoldChange	14_D_VS WT_Dlog2FoldChange
Os01g0185900	8	140	27	899	-1.81312	-2.60254	WRKY transcription factor 9
Os01g0186000	24	94	51	485	-1.1579	-2.28646	WRKY transcription factor 10
Os01g0624700	76	81	98	16	-0.440822	2.40979	WRKY transcription factor 12,03
Os01g0626400	67	85	75	272	-0.236992	-1.59738	WRKY transcription factor 11				-1
Os01g0730700	51	70	85	464	-0.810088	-2.64729	WRKY transcription factor 14
Os01g0826400	1213	494	1252	1555	-0.120323	-1.57479	WRKY transcription factor 24
Os05g0183100	843	617	759	1641	0.0767402	-1.33175	WRKY transcription factor 67
Os05g0343400	21208	5497	18335	13345	0.135327	-1.20026	WRKY transcription factor 53
Os05g0474800	345	170	279	734	0.231557	-2.03016	WRKY transcription factor 70
Os05g0565900	33	73	42	332	-0.421185	-2.10407	WRKY transcription factor 49
Os06g0146250	140	92	126	340	0.0772498	-1.80516	WRKY transcription factor 73
Os06g0158100	35	58	88	73	-1.40155	-0.252052	WRKY transcription factor 93
Os08g0386200	4476	341	1898	780	1.163	-1.11412	WRKY transcription factor 69
Os08g0499300	408	589	223	283	0.796511	1.13642	WRKY transcription factor 30
Os09g0417800	404	469	1440	1003	-1.90799	-1.01717	WRKY transcription factor 62
Os11g0116900	7	262	103	612	-3.92934	-1.14429	WRKY transcription factor 46a
Os11g0117500	67	54	528	172	-3.05056	-1.5899	WRKY transcription factor 40
Os11g0117600	591	30	1654	22	-1.5592	0.524203	WRKY transcription factor 50

## Sheet: Sheet4
gene_id	s14_L_b1_count	s14_L_b2_count	s14_L_b3_count	s14_D_b1_count	s14_D_b2_count	s14_D_b3_count	WT_L_b1_count	WT_L_b2_count	WT_L_b3_count	WT_D_b1_count	WT_D_b2_count	WT_D_b3_count	s14_L_b1_fpkm	s14_L_b2_fpkm	s14_L_b3_fpkm	s14_D_b1_fpkm	s14_D_b2_fpkm	s14_D_b3_fpkm	WT_L_b1_fpkm	WT_L_b2_fpkm	WT_L_b3_fpkm	WT_D_b1_fpkm	WT_D_b2_fpkm	WT_D_b3_fpkm	WT_DvsWT_L_WT_D	WT_DvsWT_L_WT_L	WT_DvsWT_L_log2FoldChange	WT_DvsWT_L_pvalue	WT_DvsWT_L_padj	s14_Dvss14_L_s14_D	s14_Dvss14_L_s14_L	s14_Dvss14_L_log2FoldChange	s14_Dvss14_L_pvalue	s14_Dvss14_L_padj	WT_Lvss14_L_WT_L	WT_Lvss14_L_s14_L	WT_Lvss14_L_log2FoldChange	WT_Lvss14_L_pvalue	WT_Lvss14_L_padj	WT_Dvss14_D_WT_D	WT_Dvss14_D_s14_D	WT_Dvss14_D_log2FoldChange	WT_Dvss14_D_pvalue	WT_Dvss14_D_padj	WT_Dvss14_L_WT_D	WT_Dvss14_L_s14_L	WT_Dvss14_L_log2FoldChange	WT_Dvss14_L_pvalue	WT_Dvss14_L_padj
Os01g0821600	2147	28	35	29	23	48	2388	16	10	106	61	83	99.9309	0.991307	1.29474	1.03047	0.865708	1.81568	105.207	0.700386	0.313891	3.96689	2.17203	2.79167	78.8144	940.929	-3.57753	NA	1	32.3582	877.646	-4.76135	NA	1	889.141	860.008	0.0480841	NA	1	81.3647	33.9939	1.25921	0.0113448	0.210379	79.1486	893.324	-3.49644	NA	1
Os01g0186000	18	134	273	96	147	146	55	261	266	450	434	392	1.8024	10.2062	21.7263	7.33868	11.9034	11.8812	5.21294	24.5792	17.9627	36.2299	33.2457	28.3649	401.356	197.898	1.01964	0.103439	0.59164	126.096	134.406	-0.0938554	0.905514	0.96713	187.063	130.889	0.514186	0.597401	0.947238	414.594	132.581	1.64542	3.70695e-07	8.48543e-05	403.118	138.52	1.53948	0.0463979	0.142983
Os01g0182700	13	10	16	10	14	3	19	6	37	14	20	17	0.764388	0.447253	0.747714	0.44889	0.665694	0.143358	1.05747	0.331796	1.46718	0.661874	0.89964	0.722333	15.9537	20.2094	-0.350087	0.658924	0.955277	8.6766	13.3047	-0.612151	0.476081	0.734287	18.9195	12.9859	0.557686	0.481185	0.917741	16.4898	9.14007	0.851122	0.292845	0.866181	16.0202	13.6496	0.238051	0.690414	0.829182
Os11g0117400	1431	699	488	1037	472	383	7548	89	49	2178	458	784	123.998	46.0717	33.6078	68.5998	33.0745	26.9714	619.084	7.25295	2.8634	151.743	30.3605	49.0918	1096.15	2993.91	-1.44958	NA	1	602.233	939.205	-0.640617	0.30256	0.582804	2829.26	918.026	1.62383	NA	1	1129.87	633.846	0.833763	0.181328	0.762655	1101.69	960.644	0.197828	0.791292	0.889963
Os01g0185900	8	45	67	140	105	83	25	184	98	805	513	328	0.305476	1.30702	2.03333	4.08117	3.24229	2.5757	0.903587	6.60777	2.52362	24.715	14.9856	9.05064	524.5	108.808	2.26972	0.0039945	0.1121	105.163	38.1065	1.45789	0.0328155	0.143431	103.378	37.1162	1.47363	0.12986	0.699256	541.286	110.654	2.28963	2.62354e-07	6.29385e-05	527.237	39.2539	3.74144	1.19647e-07	2.56707e-06
Os05g0129800	847	112	181	283	68	47	1049	28	72	157	27	60	55.6239	5.59472	9.44718	14.1884	3.6113	2.50846	65.2073	1.72936	3.18876	8.29	1.35647	2.8474	78.1589	440.59	-2.49503	NA	1	125.434	429.895	-1.77606	0.0632726	0.225401	416.077	420.717	-0.0159284	NA	1	80.5575	132.083	-0.71458	0.379844	0.920629	78.5452	438.698	-2.48167	0.0104428	0.0459863
Os06g0158100	30	73	65	58	71	73	88	126	243	67	105	103	1.80597	3.34268	3.10991	2.66555	3.4564	3.57144	5.01436	7.13362	9.86523	3.24296	4.83556	4.48069	85.6877	151.938	-0.82821	0.0723387	0.517134	65.3246	54.7919	0.247335	0.571808	0.80077	142.94	53.4151	1.41765	0.00384377	0.148878	88.5847	68.6888	0.368399	0.327055	0.888666	86.018	56.3337	0.605427	0.151804	0.327753
Os01g0820700	0	0	0	0	2	0	4	0	3	4	8	11	0	0	0	0	0.134389	0	0.314601	0	0.168109	0.267236	0.508529	0.660493	7.0986	2.40981	1.55942	0.259612	0.791847	0.655753	0	1.81192	0.653467	1	2.25976	0	3.63608	0.335348	1	7.34184	0.691596	3.4255	0.0435214	1	7.12027	0	5.21988	0.00446049	0.0231884
Os01g0624700	63	22	16	81	37	17	94	25	70	14	32	34	3.21559	0.854133	0.649061	3.15628	1.52721	0.70518	4.54141	1.20008	2.40952	0.574547	1.24951	1.25406	24.7674	66.1797	-1.41552	0.0483902	0.438428	42.8222	36.9411	0.220844	0.797171	0.922069	62.2838	36.126	0.792013	0.366425	0.88687	25.6175	45.0943	-0.815547	0.244904	0.829696	24.8528	37.7484	-0.593977	0.454115	0.653724
Os01g0750100	4224	7950	7289	3402	3537	3684	5547	6177	7310	5683	3301	3355	219.717	314.549	301.337	135.096	148.782	155.736	273.111	302.18	256.429	237.68	131.357	126.11	3910.34	6627.39	-0.761171	0.0560756	0.467102	3428.63	6416.02	-0.904145	0.000613578	0.00683022	6258.04	6256.69	0.000204326	0.999436	0.999944	4036.02	3605.48	0.1627	0.626223	0.988156	3928.68	6592.76	-0.746921	0.0506864	0.152642
Os01g0730700	38	355	236	73	254	281	80	617	593	432	209	225	1.67821	11.9254	8.28363	2.46125	9.07137	10.0856	3.34423	25.627	17.6616	15.34	7.06119	7.18066	275.164	438.173	-0.671509	0.390951	0.874792	198.598	197.984	0.00308539	0.99687	0.999365	414.4	192.819	1.10302	0.247863	0.818606	283.925	208.705	0.444139	0.444509	0.945299	276.482	203.92	0.437693	0.548916	0.73042
Os01g0656400	239	204	86	45	71	44	792	205	77	97	60	41	20.5088	13.3154	5.86525	2.94798	4.92694	3.0685	64.3296	16.5442	4.456	6.69255	3.93879	2.54241	63.0684	410.322	-2.70183	0.0038646	0.109919	51.7309	184.856	-1.8361	0.00124232	0.0121087	388.534	180.571	1.10553	0.265234	0.832818	65.0858	54.431	0.256699	0.623998	0.987945	63.3941	189.292	-1.57838	0.0101679	0.045045
Os05g0571200	14	37	28	45	45	69	14	74	54	101	38	62	0.956677	1.92319	1.52069	2.34757	2.48671	3.83192	0.905541	4.75575	2.48853	5.54926	1.9865	3.06159	63.7052	49.427	0.365896	0.638507	0.952536	51.4546	25.7243	0.990887	0.0576002	0.212457	46.8467	25.0774	0.89642	0.246487	0.818252	65.7275	54.075	0.280854	0.596602	0.984363	63.9882	26.4476	1.26691	0.0317875	0.108141
Os01g0820400	3	2	8	6	0	8	4	0	0	12	5	8	0.266143	0.13496	0.564065	0.406364	0	0.576786	0.33589	0	0	0.855957	0.339338	0.512864	7.90936	1.56097	2.38197	0.183392	0.723847	4.49743	4.34006	0.0505409	0.97317	0.991411	1.47499	4.23298	-1.55692	0.43353	1	8.16177	4.72075	0.787192	0.536025	0.974261	7.94376	4.46009	0.827366	0.40894	0.615476
Os01g0734000	3	6	7	113	18	27	0	5	34	219	39	35	0.188952	0.287451	0.350408	5.43349	0.916809	1.38205	0	0.296176	1.44418	11.0905	1.87916	1.593	95.001	11.5583	3.02448	0.0273299	0.333142	49.8008	5.24159	3.23898	0.000372765	0.00453361	10.7561	5.1103	1.08277	0.472882	0.915422	97.8548	52.4188	0.898791	0.320367	0.885271	95.5584	5.38872	4.13807	1.07424e-05	0.000141741
Os01g0826400	997	638	415	496	315	250	1186	971	549	1425	358	470	34.2963	16.6938	11.3461	13.0257	8.7627	6.98911	38.6171	31.4138	12.7361	39.4133	9.42113	11.6834	722.772	994.552	-0.460412	0.527857	0.925142	339.353	724.078	-1.09262	0.0349317	0.149548	942.558	707.466	0.414002	0.531018	0.931002	745.055	357.105	1.06071	0.0653799	0.518196	726.533	741.171	-0.0286158	0.967051	0.982794
Os01g0714800	3	21	17	4	16	4	10	20	40	44	15	11	0.178024	0.947891	0.801772	0.181212	0.767808	0.192907	0.561693	1.11619	1.60077	2.09936	0.680951	0.471702	22.5155	22.9728	-0.0378458	0.96537	0.996355	7.80439	12.9744	-0.744483	0.479938	0.737139	21.5993	12.6374	0.766288	0.375404	0.891336	23.2119	8.21941	1.49801	0.118975	0.663585	22.6408	13.3613	0.747351	0.42019	0.625596
Os06g0649000	388	329	243	76	118	189	1192	858	466	484	325	463	19.4396	12.5381	9.67623	2.90695	4.78093	7.69568	56.5293	40.4289	15.7453	19.4974	12.4568	16.7631	399.395	929.607	-1.21843	0.0311883	0.354241	124.582	332.159	-1.41451	0.00485067	0.0353589	880.976	324.356	1.44171	0.0196184	0.331396	412.446	130.879	1.65657	0.000123595	0.0097198	400.989	340.38	0.237562	0.544086	0.726831
Os07g0111400	12	247	192	21	74	82	43	37	95	39	80	52	0.799181	12.5125	10.1627	1.06771	3.98539	4.43821	2.71066	2.31748	4.26676	2.08836	4.07588	2.50256	53.4518	58.0026	-0.122384	0.822937	0.980468	57.8206	140.78	-1.28563	0.169421	0.418523	54.4864	137.069	-1.33064	0.160782	0.738807	55.2707	60.7626	-0.135464	0.829	0.998562	53.6851	145.088	-1.43567	0.104249	0.254041
Os08g0499300	344	1114	834	593	1007	780	214	349	2302	265	439	339	10.3542	25.5051	19.9513	13.6265	24.5112	19.0803	6.097	9.8795	46.7279	6.41331	10.1086	7.37357	326.078	870.137	-1.41648	0.0803674	0.543114	771.148	740.674	0.057557	0.898708	0.96483	811.064	721.89	0.168321	0.845577	0.983725	337.094	811.101	-1.26655	0.000299647	0.0193913	327.454	761.816	-1.21865	0.00613102	0.0300503
Os06g0504900	1	2	4	1	19	1	0	7	0	12	59	35	0.0609768	0.0927635	0.193852	0.0465515	0.936902	0.0495559	0	0.401433	0	0.588332	2.75223	1.54224	32.8883	2.7134	3.62929	0.0197162	0.283584	6.86924	2.27472	1.58147	0.323795	0.603758	2.60688	2.21702	0.208696	0.925219	1	34.0384	7.24182	2.23643	0.0552509	0.480486	33.0239	2.34051	3.79677	0.000104773	0.00102307
Os02g0770500	7	12	19	167	83	57	6	430	20	1260	423	393	0.227843	0.297099	0.491515	4.14977	2.1847	1.5078	0.184855	13.163	0.439015	32.975	10.5329	9.24376	665.84	174.681	1.931	NA	1	97.7321	12.4654	2.96256	2.04005e-06	4.99652e-05	167.581	12.153	3.78279	NA	1	686.523	102.876	2.73761	4.50735e-06	0.000723308	669.389	12.8169	5.69893	1.26566e-17	1.43923e-15
Os04g0471700	20	6	13	0	2	1	50	0	0	1	0	0	0.449629	0.102602	0.232281	0	0.0363605	0.0182707	1.06399	0	0	0.0180759	0	0	0.330425	19.5121	-5.85437	0.0545569	0.459632	0.985693	13.9347	-3.82874	0.00493163	0.0357284	18.4373	13.6177	0.436824	0.83551	0.982992	0.339759	1.03698	-1.57126	0.642938	1	0.332659	14.2614	-5.39026	0.000733519	0.00532923
Os04g0545000	7	9	15	153	28	39	5	15	28	100	110	38	0.417137	0.407949	0.710423	6.96051	1.34932	1.88876	0.282029	0.840662	1.12525	4.79134	5.01466	1.63637	78.883	15.6881	2.31822	0.00270882	0.0865993	69.4249	10.2858	2.75236	0.000658674	0.00720624	14.7544	10.0313	0.563999	0.491985	0.920688	81.4679	73.0724	0.155206	0.83157	0.998562	79.3182	10.5693	2.90198	9.82715e-06	0.000131258
Os02g0265200	15	1	6	5	18	14	8	1	3	10	13	24	0.538222	0.0272931	0.171106	0.136965	0.522298	0.408252	0.271708	0.0337458	0.0725943	0.288501	0.356847	0.622299	14.5085	4.3584	1.75393	0.105097	0.595586	12.0692	8.19829	0.575818	0.622926	0.831651	4.10715	8.0204	-0.96152	0.499789	0.92157	15.0002	12.6912	0.24676	0.760567	0.998562	14.5495	8.37314	0.820775	0.441043	0.643095
Os11g0117500	59	44	30	56	39	41	506	36	27	153	74	90	3.45766	1.9614	1.39732	2.50546	1.84829	1.95274	28.0688	1.98419	1.0671	7.20939	3.31765	3.81146	100.506	219.057	-1.12351	NA	1	43.6552	46.473	-0.0826765	0.87535	0.956047	207.055	45.3936	2.1902	NA	1	103.716	45.9184	1.17376	0.0115886	0.213521	100.97	47.5972	1.08985	0.048192	0.147009
Os05g0322900	4271	2445	1118	747	886	1416	6741	2018	1109	1284	1373	1931	177.027	77.0851	36.8295	23.6374	29.6974	47.6983	264.47	78.6647	30.9993	42.7909	43.5359	57.8375	1428.52	3726.64	-1.38327	0.0730295	0.518876	989.003	2805.28	-1.504	0.0142292	0.0798964	3527.35	2741.98	0.363371	0.697245	0.967138	1476.29	1039.17	0.506686	0.151525	0.716446	1433.56	2869.2	-1.00089	0.0883563	0.227081
Os11g0116900	6	114	116	262	142	197	93	279	368	564	387	342	0.400344	5.78587	6.15155	13.346	7.66207	10.6826	5.87364	17.508	16.5593	30.2578	19.7543	16.4902	409.423	248.565	0.719112	0.208027	0.751743	192.685	73.8274	1.38101	0.0976903	0.298822	234.461	71.8818	1.70355	0.081283	0.593683	422.667	202.628	1.06001	0.00520139	0.129219	411.361	76.0942	2.43162	0.00383261	0.020518
Os07g0680400	77	405	235	146	125	119	83	254	356	83	91	109	3.06934	12.2798	7.44504	4.443	4.0294	3.85506	3.13166	9.52221	9.57008	2.66017	2.775	3.13978	88.3545	231.577	-1.39084	0.0134336	0.225346	125.456	228.48	-0.866465	0.113755	0.328082	218.324	222.604	-0.0284772	0.968616	0.996052	91.3035	131.962	-0.530973	0.0799472	0.568146	88.6901	235.143	-1.40804	0.0115321	0.0497668
Os05g0565900	29	40	28	73	70	70	39	288	153	308	98	157	1.37972	1.44756	1.05876	2.65147	2.6932	2.70659	1.75631	12.8865	4.90904	11.7821	3.56688	5.39774	179.138	170.147	0.0744243	0.928823	0.992021	68.6517	32.6325	1.07435	0.00599739	0.0413622	161.659	31.8416	2.34377	0.00335669	0.138787	184.767	72.201	1.35503	0.00721896	0.158165	179.975	33.4889	2.42595	1.75195e-05	0.000216331
Os05g0137500	333	191	175	169	195	227	503	877	268	466	410	366	16.5435	7.21768	6.9098	6.40971	7.83416	9.16513	23.6534	40.9762	8.97901	18.6142	15.5824	13.1396	391.388	612.071	-0.64461	0.293884	0.820188	191.163	246.633	-0.365732	0.439217	0.704811	582.19	240.961	1.2731	0.0774387	0.57945	404.231	200.974	1.00822	0.000784291	0.038327	393.146	252.503	0.640568	0.162901	0.34306
Os11g0117600	495	4	0	30	1	12	1590	0	0	23	5	5	75.3614	0.463219	0	3.48686	0.123118	1.48476	229.131	0	0	2.81546	0.582348	0.550088	10.6542	620.485	-5.86429	NA	1	13.5767	199.043	-3.87314	NA	1	586.307	195.064	1.58769	NA	1	10.978	14.2787	-0.384629	0.748821	0.998393	10.7141	202.554	-4.24137	NA	1
Os05g0343400	17774	10121	9127	5531	4607	4460	17472	10110	8734	12217	5336	5770	641.659	277.923	261.874	152.438	134.497	130.853	597.042	343.258	212.64	354.618	147.368	150.527	7425.2	13208.5	-0.830958	0.163568	0.69809	4694.74	13074.1	-1.47754	0.000805315	0.00848176	12492.5	12773.7	-0.032106	0.958612	0.996052	7660.24	4938.14	0.633394	0.120543	0.667228	7461.49	13384.5	-0.843021	0.129796	0.294657
Os03g0321700	2	35	42	22	27	5	3	29	34	48	46	32	0.167758	2.23308	2.79994	1.40879	1.83145	0.340844	0.238187	2.28772	1.92329	3.23722	2.95176	1.93965	39.8083	22.0321	0.848851	0.330778	0.841509	17.3147	24.7507	-0.520537	0.62669	0.833495	20.8002	24.0987	-0.21499	0.857784	0.984684	41.1148	18.2415	1.1709	0.0935029	0.607743	39.9989	25.5119	0.640966	0.473936	0.669478
Os01g0842801	6	3	1	3	0	0	3	2	6	4	1	0	0.631151	0.240041	0.083604	0.24092	0	0	0.298707	0.197862	0.425642	0.338313	0.080473	0	1.63596	3.64366	-1.17962	0.492462	1	0.928954	3.62792	-1.93698	0.358074	1	3.4206	3.5473	-0.0063009	0.996005	1	1.68471	0.978822	0.768499	0.789794	1	1.64694	3.70794	-1.17177	0.492478	1
Os03g0657400	72	53	39	25	20	22	52	15	64	2	6	16	11.8815	6.6527	5.11505	3.14955	2.66898	2.95048	8.12243	2.32799	7.12248	0.265367	0.757459	1.908	7.2923	44.2156	-2.59327	0.00589137	0.142101	21.5575	57.2576	-1.40322	0.00929811	0.0581659	41.5028	55.926	-0.424405	0.537279	0.932857	7.54614	22.6713	-1.57757	0.0600215	0.499653	7.30382	58.6471	-2.9906	0.000138141	0.00129971
Os09g0417800	319	797	406	472	431	488	1361	231	153	919	871	1181	16.7532	31.8381	16.9464	18.9242	18.3046	20.8285	67.6563	11.4096	5.41888	38.806	34.994	44.8204	927.689	663.952	0.482896	0.588831	0.945354	448.481	498.685	-0.153805	0.683261	0.86604	627.914	486.26	0.368433	0.701225	0.967519	958.512	471.589	1.0234	1.66744e-05	0.00209967	931.135	512.407	0.861056	0.0226912	0.0839371
Os12g0116700	250	161	136	122	135	144	440	45	35	118	108	186	14.8353	7.26716	6.41417	5.52695	6.47838	6.94464	24.7145	2.51142	1.40067	5.63009	4.90285	7.97605	128.101	199.053	-0.634888	NA	1	129.552	191.983	-0.565084	0.2102	0.476019	188.163	187.543	0.00441161	NA	1	132.373	136.224	-0.0402166	0.907291	0.998562	128.525	196.6	-0.610516	0.192323	0.381731
Os02g0698800	0	1	0	0	1	0	0	0	0	1	0	0	0	0.0330363	0	0	0.0351225	0	0	0	0	0.034921	0	0	NA	NA	NA	NA	NA	0.327877	0.304509	-0.0671447	0.986871	1	NA	NA	NA	NA	NA	0.339759	0.345798	-0.0659424	0.987106	1	0.332659	0.313798	-0.139539	0.97272	1
Os05g0183100	713	1453	1465	622	559	658	720	1445	1433	1506	823	740	63.8131	98.9164	104.209	42.4992	40.4584	47.8605	60.9952	121.629	86.4924	108.373	56.3493	47.8598	975.756	1246.56	-0.353463	0.488107	0.913777	592.986	1191.09	-1.00667	0.00117478	0.0115593	1178.49	1161.33	0.0208854	0.962125	0.996052	1006.92	623.509	0.691286	0.0693951	0.531999	980.558	1224.31	-0.320662	0.471107	0.666838
Os08g0386200	3704	490	281	343	235	255	1799	334	288	731	467	344	190.568	19.176	11.4903	13.4723	9.77738	10.6623	87.6098	16.1612	9.99269	30.2394	18.3808	12.7895	490.338	913.002	-0.896687	0.300208	0.823581	267.396	1718.44	-2.68383	0.00385387	0.0296502	863.098	1682.57	-0.963085	NA	1	506.076	281.248	0.846995	0.0329108	0.376432	492.812	1751.81	-1.82964	0.060523	0.174315
Os05g0537100	395	617	635	538	914	970	669	762	1350	876	1082	1192	24.2951	28.8662	31.0413	25.2623	45.4615	48.4868	38.9485	44.0785	55.9973	43.3214	50.9116	52.9805	983.053	938.422	0.0665954	0.833166	0.982051	786.313	546.728	0.523824	0.149093	0.388086	883.615	533.248	0.728694	0.0156104	0.293048	1016	826.621	0.297805	0.376071	0.918804	986.829	561.613	0.812615	0.000649914	0.00483033
Os05g0474800	298	118	83	174	45	59	269	285	92	671	37	96	9.42235	2.83797	2.08577	4.20012	1.15062	1.51609	8.05078	8.47496	1.96174	17.0586	0.894979	2.19347	261.818	241.48	0.116924	0.913735	0.992021	88.1002	181.297	-1.03887	0.171815	0.421809	229.396	177.267	0.372356	0.660809	0.961378	269.503	92.7104	1.5388	0.0997393	0.623863	263.362	185.319	0.507563	0.630271	0.789163
Os02g0181300	8670	2678	2826	1726	2337	1878	11375	3796	4722	2808	2304	2419	385.785	90.64	99.9411	58.6323	84.0933	67.913	479.094	158.856	141.698	100.462	78.4291	77.7823	2369.41	7246.51	-1.61273	0.00608689	0.143789	1920.33	5174.88	-1.43009	0.0201369	0.102061	6843.39	5060.33	0.435508	0.596234	0.947238	2447.12	2019.92	0.276788	0.304011	0.874972	2379.6	5289	-1.1522	0.0630951	0.179553
Os11g0490900	232	1028	1007	1086	1005	1048	389	1576	1525	2069	1726	1751	13.99	47.1525	48.2618	49.9952	49.0084	51.3595	22.2035	89.3789	62.0169	100.315	79.6229	76.3015	1745.45	1194.2	0.547481	0.345344	0.848113	1011.57	724.482	0.480998	0.345913	0.6251	1129.29	705.845	0.677715	0.35844	0.884887	1802.7	1063.83	0.760806	0.00106048	0.0475217	1753.02	745.779	1.23248	0.0192924	0.0742063
Os06g0146250	115	85	135	95	96	97	118	147	98	306	343	302	4.27142	2.40146	3.98523	2.69381	2.88351	2.92804	4.14857	5.13501	2.45477	9.13845	9.74622	8.10586	298.481	130.759	1.19393	0.00455856	0.121036	92.8972	114.572	-0.300149	0.428054	0.695959	123.892	111.834	0.146489	0.768121	0.978778	308.398	97.6952	1.65849	8.47454e-10	4.79215e-07	299.766	117.525	1.35349	7.20814e-05	0.000734825
Os09g0334500	3147	2288	1981	1376	1403	1400	2986	2385	2030	2092	1404	1641	130.134	71.9667	65.1063	43.4391	46.9166	47.0492	116.876	92.7537	56.611	69.5555	44.4149	49.0366	1619.22	2664.14	-0.718255	0.0956632	0.57348	1348.01	2581.42	-0.937115	0.010976	0.0658267	2520.31	2521.14	-0.000474445	0.999241	0.999944	1671.87	1417.65	0.23789	0.386146	0.922448	1626.23	2644.66	-0.701425	0.0801299	0.21215
Os05g0321900	0	8	0	6	0	10	6	31	5	5	3	12	0	0.260613	0	0.196175	0	0.34806	0.243231	1.24864	0.144413	0.172175	0.098291	0.371384	6.15432	15.7727	-1.34691	0.254085	0.788037	5.15731	2.43608	1.06786	0.661451	0.85303	15.0652	2.37095	2.64023	0.153589	0.730852	6.36024	5.41152	0.235427	0.864485	0.998562	6.16772	2.51038	1.27491	0.479918	0.674615
Os09g0417600	475	329	169	432	380	609	1492	108	82	716	535	774	23.7816	12.5293	6.7248	16.512	15.3853	24.7797	70.7065	5.08535	2.76868	28.8229	20.4913	28.0031	634.297	647.306	-0.0290423	NA	1	459.296	343.506	0.420192	0.43013	0.698006	611.841	335.628	0.866307	0.468196	0.915222	655.15	482.695	0.440807	0.168847	0.743852	636.736	351.594	0.857915	0.0966289	0.24112
Os01g0584900	29	184	61	50	41	28	17	224	11	72	73	107	1.88179	9.08181	3.14592	2.47692	2.15145	1.47659	1.04415	13.67	0.481367	3.75648	3.62379	5.01735	78.4699	96.5753	-0.297932	NA	1	38.1638	86.9268	-1.1901	0.0848878	0.273283	92.5663	84.6877	0.12604	0.920827	0.991334	81.0899	40.1623	1.01336	0.0164389	0.261502	78.7448	89.4524	-0.18671	0.776749	0.881332
Os05g0583000	637	133	173	108	205	226	1621	143	425	292	338	514	30.8876	4.90544	6.66708	3.99795	8.03848	8.90601	74.3995	6.52124	13.8977	11.3842	12.538	18.0105	355.166	808.265	-1.18608	0.178051	0.716445	175.223	349.831	-0.996554	0.184634	0.441158	762.169	342.224	1.15556	0.289919	0.848692	367.105	184.184	0.99583	0.0153916	0.25072	356.341	357.276	-0.0026085	0.997143	0.99834
Os03g0444900	104	190	202	268	187	112	130	152	229	189	187	168	6.54452	9.09453	10.1028	12.875	9.51616	5.72787	7.74338	8.99576	9.71832	9.56276	9.00232	7.63962	171.049	174.446	-0.0301361	0.925875	0.992021	181.253	163.356	0.149118	0.731315	0.889917	164.448	159.291	0.0448498	0.89561	0.989323	176.698	190.789	-0.111441	0.776948	0.998562	171.798	167.88	0.0304015	0.923548	0.961241
Os05g0478700	10	12	2	0	0	7	3	6	0	5	1	4	0.606633	0.553719	0.0964276	0	0	0.345108	0.172262	0.342316	0	0.243878	0.0464082	0.175349	3.15286	3.4965	-0.129847	0.939943	1	2.30958	8.28361	-1.84554	0.315907	0.596472	3.34071	8.08947	-1.30134	0.385182	0.893232	3.25261	2.41772	0.430769	0.833528	1	3.16477	8.48534	-1.42001	0.225883	0.423945
Os07g0583700	716	1001	963	1659	1241	1190	781	1046	1398	1600	1152	1212	21.7828	23.1642	23.2848	38.5315	30.5315	29.4224	22.4903	29.9283	28.6826	39.1379	26.8115	26.6454	1250.21	1105.8	0.17687	0.607508	0.948057	1313.23	895.763	0.551883	0.0222506	0.1095	1043.24	873.855	0.255632	0.328093	0.870545	1290.92	1381.44	-0.0979417	0.734165	0.9961	1255.74	919.763	0.448927	0.102858	0.251904
Os07g0596900	122	150	176	405	367	312	149	249	349	330	250	394	5.75408	5.38133	6.59742	14.5828	13.9978	11.9592	6.65189	11.045	11.1008	12.5143	9.02037	13.4286	304.473	253.414	0.263999	0.516944	0.921019	348.681	150.14	1.21556	6.1393e-06	0.000130316	238.969	146.474	0.707013	0.0599704	0.527787	314.512	366.81	-0.221875	0.44431	0.945298	305.592	154.158	0.987094	0.000933476	0.00647968
Os08g0276200	285	250	288	550	225	183	211	162	183	494	196	274	16.5787	11.0619	13.3151	24.4252	10.5844	8.65143	11.618	8.86281	7.17908	23.1052	8.72229	11.518	306.099	196.916	0.636931	0.227068	0.768479	304.459	281.182	0.115666	0.816769	0.93065	186.007	274.467	-0.562044	0.13794	0.712264	315.801	320.461	-0.0216775	0.96799	0.998922	307.513	288.399	0.092756	0.844107	0.919091
Os01g0289600	194	832	703	931	534	649	257	746	643	1651	862	990	10.8742	35.4731	31.318	39.8394	24.2053	29.5644	13.6355	39.3262	24.3061	74.4076	36.9632	40.1003	1110.08	571.397	0.958066	0.0878688	0.556712	677.502	553.392	0.291264	0.571647	0.800635	540.789	539.195	0.00373339	0.995496	0.999482	1145.64	712.574	0.68482	0.0768466	0.55837	1115.2	569.546	0.968769	0.0824821	0.216481
Os09g0481700	1903	2359	2036	1809	936	1070	1707	1777	1864	1650	1111	1061	48.7414	45.9589	41.4459	35.3726	19.387	22.2727	41.3843	42.8052	32.1971	33.9797	21.7691	19.6378	1209.06	1882.37	-0.638652	0.0898433	0.561275	1220.09	2123.29	-0.799162	0.0178425	0.0939806	1778.83	2071.89	-0.22023	0.419408	0.904077	1248.19	1283.46	-0.0403848	0.913357	0.998562	1214.67	2179.01	-0.843236	0.00847125	0.0390214
Os12g0116600	2261	1061	993	1014	475	361	4271	173	141	613	348	490	49.8646	17.7988	17.4055	17.0726	8.47152	6.47038	89.1588	3.58829	2.09712	10.87	5.87137	7.8092	457.257	1773.68	-1.95561	NA	1	588.836	1540.98	-1.38755	0.0190739	0.0983379	1676.23	1506.02	0.154455	NA	1	472.055	619.781	-0.393094	0.387832	0.923409	459.177	1576.68	-1.77959	0.000972282	0.00670995
Os12g0507300	634	411	547	1509	755	658	639	575	775	1554	669	699	37.4029	18.4434	25.6477	67.9633	36.0196	31.548	35.6828	31.9031	30.8339	73.7129	30.1933	29.7997	931.058	691.534	0.42899	0.392575	0.875125	931.911	551.662	0.757108	0.100248	0.304209	652.498	538.689	0.277222	0.484931	0.918117	960.481	980.69	-0.0302572	0.95067	0.998562	935.667	565.426	0.726962	0.157525	0.33581
Os12g0116400	94	204	175	369	140	188	162	113	200	329	172	188	6.58224	10.8657	9.73933	19.7261	7.92775	10.6988	10.7375	7.44173	9.44468	18.5233	9.21388	9.5131	218.527	163.61	0.416842	0.373512	0.866023	222.193	155.076	0.517823	0.276338	0.554037	154.137	151.203	0.0257075	0.946146	0.995108	225.52	233.74	-0.0524668	0.913307	0.998562	219.552	159.39	0.459832	0.301158	0.509093
Os01g0626400	57	29	32	85	90	77	73	44	63	257	53	110	2.7046	1.04667	1.20677	3.07905	3.4534	2.96927	3.27864	1.9635	2.01595	9.80479	1.92385	3.77172	134.203	63.3689	1.08305	0.131773	0.650193	81.2346	41.739	0.970608	0.0606761	0.220151	59.7848	40.781	0.55796	0.352521	0.883951	138.353	85.45	0.694517	0.246175	0.829929	134.85	42.73	1.66216	0.0229688	0.084687
Os03g0758000	73	83	110	120	104	122	100	62	65	182	129	126	7.42524	6.42167	8.89254	9.31834	8.55455	10.0851	9.62788	5.93102	4.45874	14.8846	10.038	9.2614	138.051	81.4487	0.764213	0.122932	0.635233	111.51	89.2649	0.32103	0.324834	0.604787	76.9675	87.0876	-0.182365	0.699477	0.967239	142.535	117.253	0.28075	0.413305	0.932016	138.68	91.6536	0.59644	0.100351	0.247679
Os03g0741400	539	369	367	676	660	576	716	241	860	437	476	604	21.2698	11.076	11.5103	20.3653	21.0617	18.4726	26.7442	8.9442	22.8868	13.8654	14.3698	17.2238	473.142	616.166	-0.38121	0.4624	0.907159	615.768	443.934	0.473372	0.204086	0.467442	578.741	433.565	0.41743	0.474781	0.915977	488.946	647.731	-0.405469	0.0909381	0.601556	474.893	454.832	0.0636165	0.864207	0.930287
[truncated: 14 more columns]
